# Supplementary material for: High proton conductivity behavior in a 2D metal sulfite constructed from a histidine ligand
Source: Royal Society of Chemistry journal article supplement (doi:10.1039/c9ra01584a), 2019-01-01
Supplement: c9ra01584a1.pdf [file c9ra01584a1.pdf]

## **High proton conductivity behavior in a 2D metal sulfite constructed from a histidine ligand**

Yike Ma<sup>a</sup>, Liangliang Huang<sup>a\*</sup>, Zhijia Xiu<sup>a</sup>, Yuheng Yang<sup>a</sup>, Xiaodong Wang<sup>a</sup>, Yanzhen Yin<sup>c\*</sup>,  
Yanfeng Bi<sup>a\*</sup>, Zhiping Zheng<sup>a, b</sup>

<sup>a</sup> School of Chemistry and Material Science, Liaoning Shihua University, Fushun 113001,  
Liaoning, P. R. China.

<sup>b</sup> Shenzhen Grubbs Institute and Department of Chemistry, Southern University of Science and  
Technology, Shenzhen, Guangdong, 518000, P. R. China.

<sup>c</sup> Qinzhou Key Laboratory of Biowaste Resources for Selenium-enriched Functional Utilization,  
College of Petroleum and Chemical Engineering, Beibu Gulf University, qinzhou, 535011,  
Guangxi, P. R. China.

\* To whom correspondence should be addressed. E-mail: huangll@lnpu.edu.cn (L. L. Huang);  
biyanfeng@lnpu.edu.cn (Y. F. Bi); yinyanzhen2018@163.com (Y.Z. Yin)

Fig. S1 Simulated and experimental power X-ray diffraction patterns

Fig. S2 The IR spectrum of compound **1**.

Fig. S3 The asymmetric unit structure of compound **1**.

Fig. S4 View of the 1D H-bonding array between the between histidine molecules and sulfite groups.

Fig. S5 Nyquist plots at various temperatures at 44% RH.

Fig. S6 Nyquist plots at various temperatures at 58% RH.

Fig. S7 Nyquist plots at various temperatures at 76% RH.

Fig. S8 The TG curve of compound **1**.

Fig. S9 Room-temperature emission spectra of L -histidine and compound **1** ( $\lambda_{\text{ex}} = 407 \text{ nm}$ ).

Table S1 Selected bond lengths [ $\text{\AA}$ ] and angles [deg.] for compound **1**.

Table S2 Hydrogen bonds for compound **1** [ $\text{\AA}$  and deg.].

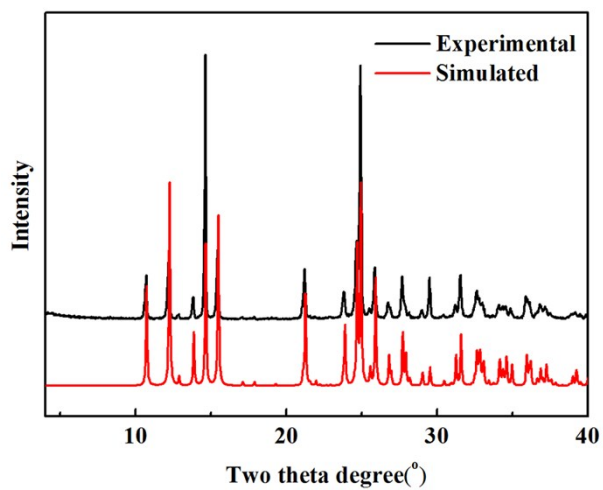

**Fig. S1** Simulated and experimental power X-ray diffraction patterns.

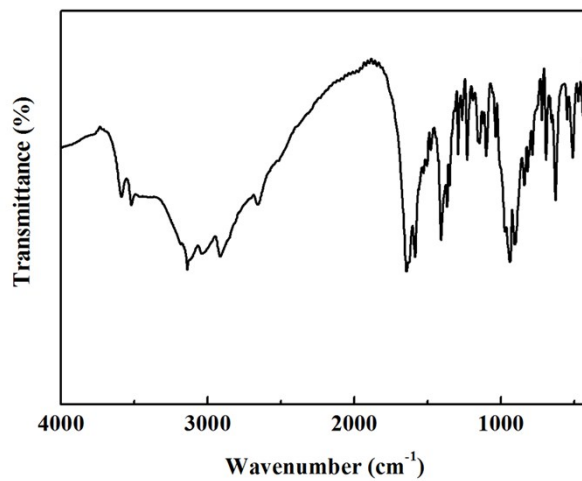

**Fig. S2** The IR spectrum of compound 1.

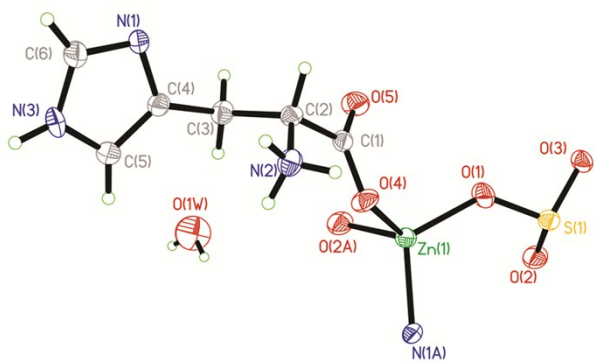

**Fig. S3** The asymmetric unit structure of compound **1**.

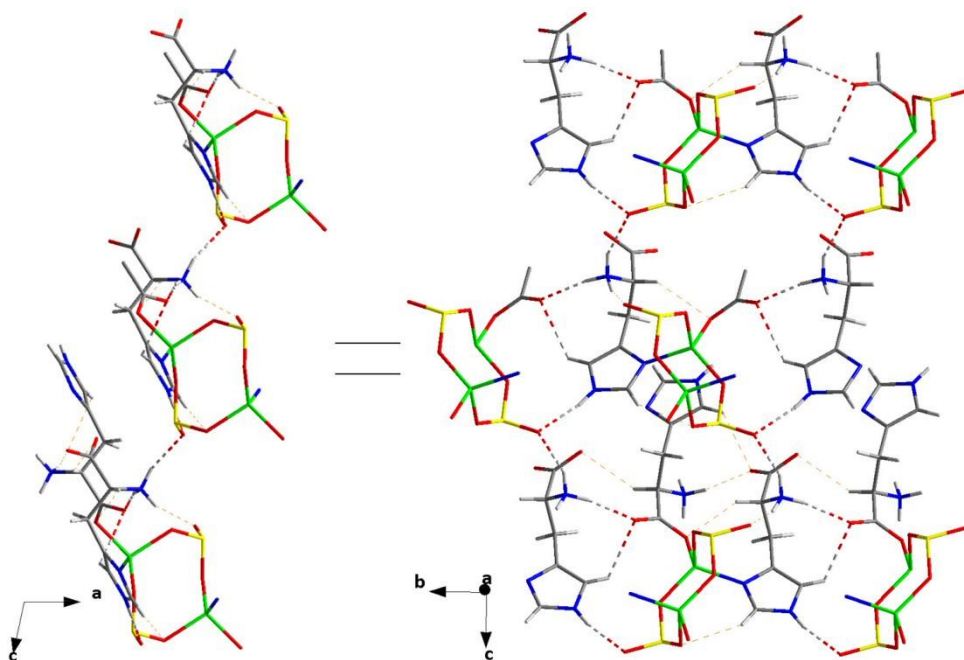

**Fig. S4** View of the 1D H-bonding array between the between histidine molecules and sulfite groups.

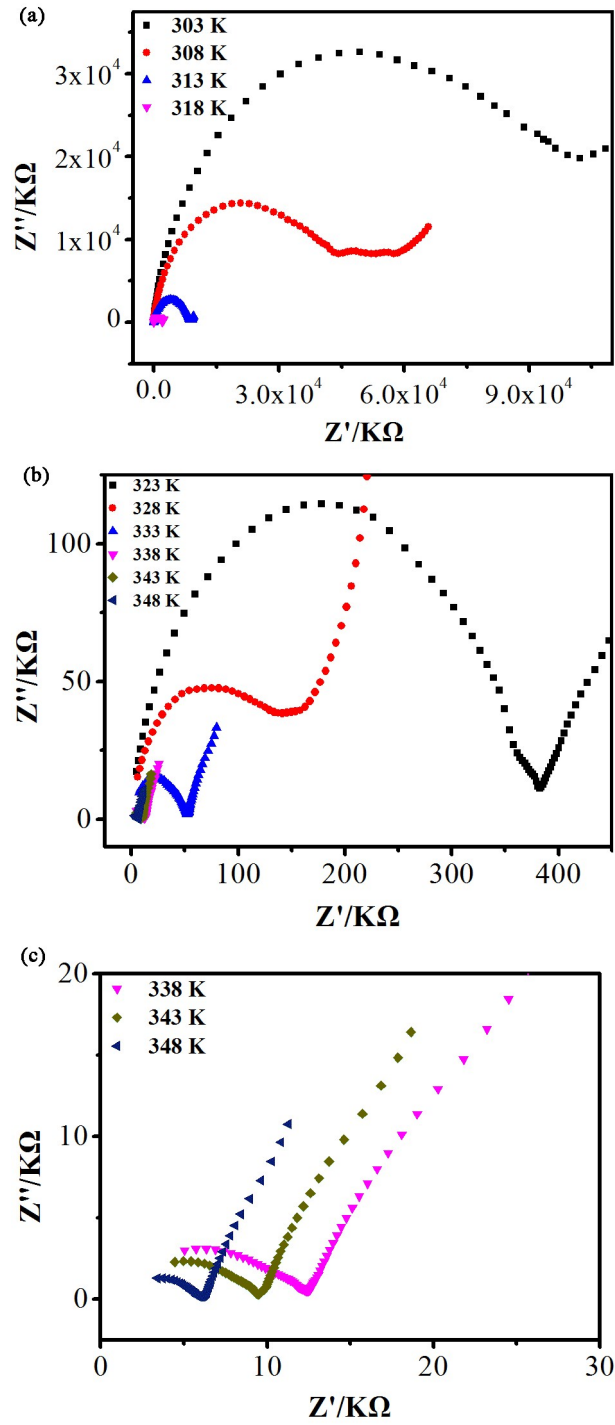

Fig. S5 Nyquist plots at various temperatures at 44 % RH.

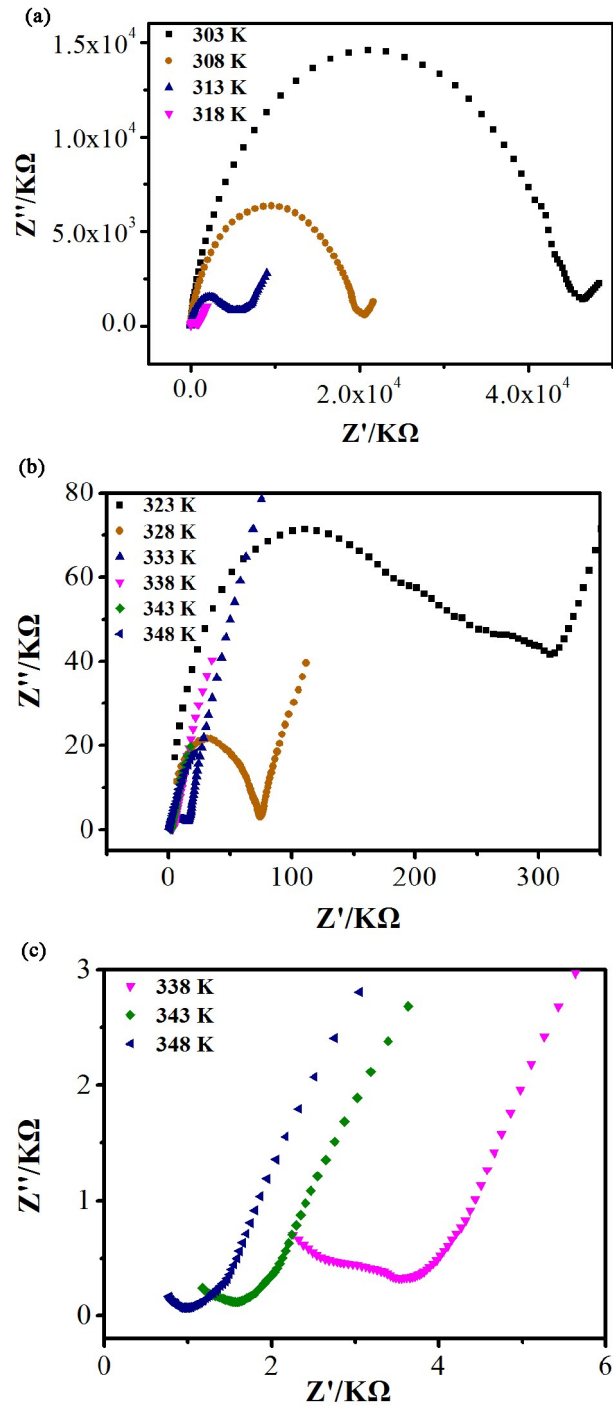

Fig. S6 Nyquist plots at various temperatures at 58 % RH.

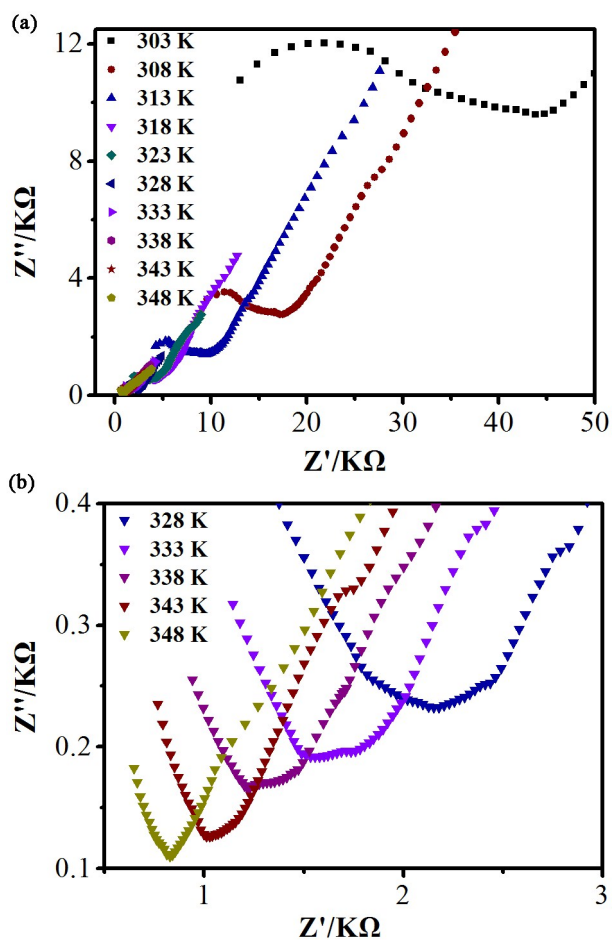

Fig. S7 Nyquist plots at various temperatures at 76 % RH.

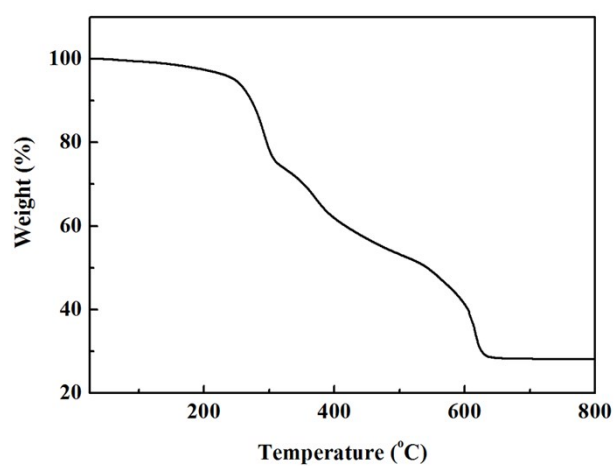

Fig. S8 The TG curve of compound 1.

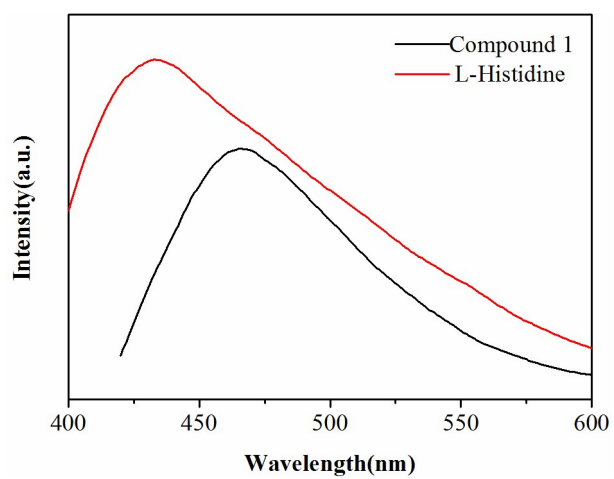

**Fig. S9** Room-temperature emission spectra of L-histidine and compound **1** ( $\lambda_{ex} = 407$  nm).



**Table S1.** Selected bond lengths [Å] and angles [deg.] for compound **1**.

|                         |            |                                      |            |
|-------------------------|------------|--------------------------------------|------------|
| Zn1-O1                  | 1.9247(18) | Zn1-O2 <sup>a</sup>                  | 1.973(2)   |
| Zn1-O4                  | 1.9853(19) | Zn1-N1                               | 1.989(2)   |
| S1-O1                   | 1.5362(19) | S1-O2                                | 1.527(2)   |
| S1-O3                   | 1.5167(18) |                                      |            |
| O1-Zn1-O4               | 112.68(8)  | O1-Zn1-O2 <sup>a</sup>               | 111.21(9)  |
| O1-Zn1-N1 <sup>b</sup>  | 115.53(8)  | O2 <sup>a</sup> -Zn1-O4              | 102.49(8)  |
| O4-Zn1-N1 <sup>b</sup>  | 107.54(8)  | O2 <sup>a</sup> -Zn1-N1 <sup>b</sup> | 106.40(8)  |
| O1-S1-O2                | 105.12(12) | O1-S1-O3                             | 102.87(10) |
| O2-S1-O3                | 106.49(11) | Zn1-O1-S1                            | 132.57(11) |
| Zn1 <sup>a</sup> -O2-S1 | 125.46(12) | Zn1-C1-O4                            | 117.34(17) |
| C4-N1-C6                | 105.9(2)   | Zn1 <sup>c</sup> -N1-C4              | 129.32(17) |
| Zn1 <sup>c</sup> -N1-C6 | 123.62(19) |                                      |            |

Symmetry transformations used to generate equivalent atoms: <sup>a</sup> 1-x, 1-y, 1-z; <sup>b</sup> 3/2-x, -1/2+y, 3/2-z;

<sup>c</sup> 3/2-x, 1/2+y, 3/2-z.

**Table S2** Hydrogen bonds for compound **1** [ $\text{\AA}$  and deg.].

| D-H...A      | d(D-H) | d(H...A) | D(D...A) | <DHA   |
|--------------|--------|----------|----------|--------|
| O1W-H1W...O5 | 0.85   | 2.13     | 2.828(2) | 138.0  |
| N2-H2A...O5  | 0.89   | 1.97     | 2.848(3) | 168.0  |
| N2-H2B...O3  | 0.89   | 1.92     | 2.770(3) | 159.0  |
| N2-H2C...O3  | 0.89   | 2.06     | 2.877(3) | 152.0  |
| N3-H3...O3   | 0.86   | 1.94     | 2.791(3) | 168.0  |
| C2-H2...O4   | 0.98   | 2.55     | 3.288(3) | 132.00 |
| C5-H5...O5   | 0.93   | 2.54     | 3.100(3) | 119.0  |
| C6-H6...O2   | 0.93   | 2.60     | 3.426(3) | 149.0  |
